# Supplementary material for: New Butyroside D from Argan Press Cake Possess Anti-Melanogenesis Effect via MITF Downregulation in B16F10 and HEM Cells
Source: MDPI journal article supplement (doi:10.3390/ijms232416021), 2022-12-16
Supplement: s1 [file s1]

## Butyroside D

White amorphous powder,  $[\alpha]_{\text{D}}^{25} - 22.4$  ( $c$  0.86, EtOH).

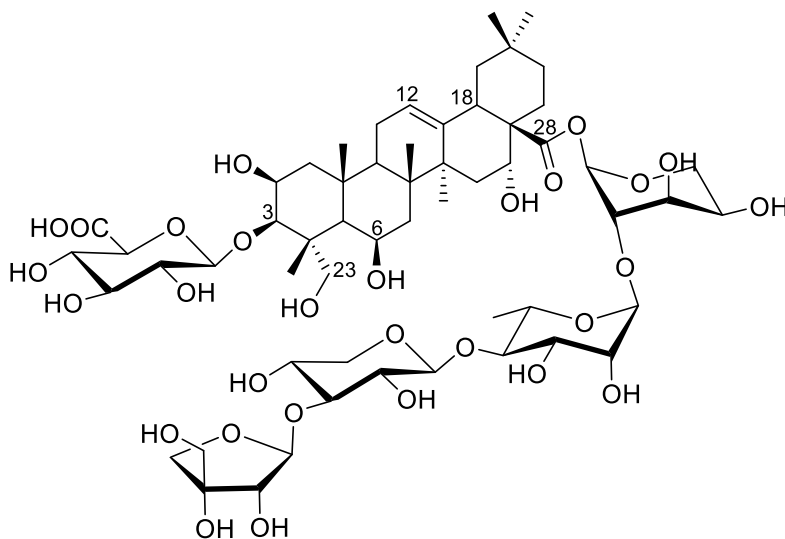

Chemical Formula:  $\text{C}_{57}\text{H}_{90}\text{O}_{29}$   
Exact Mass: 1238.5568

### Structure of Butyroside D

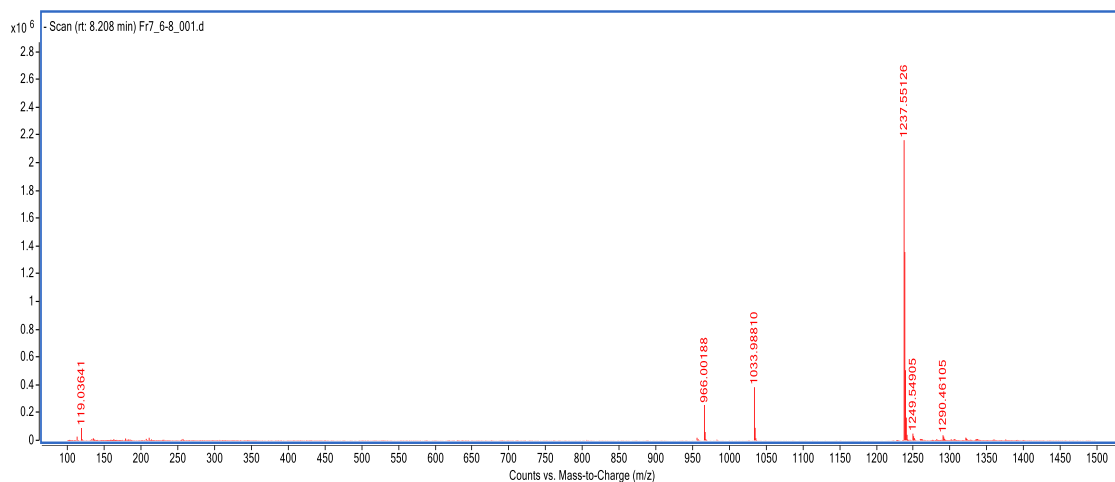

### HR-ESI-MS of Butyroside D

- Measured  $[\text{M}-\text{H}]^-$  1237.5513
- Calculated  $[\text{M}-\text{H}]^-$  1237.5490

$$\Delta = 0.0023$$

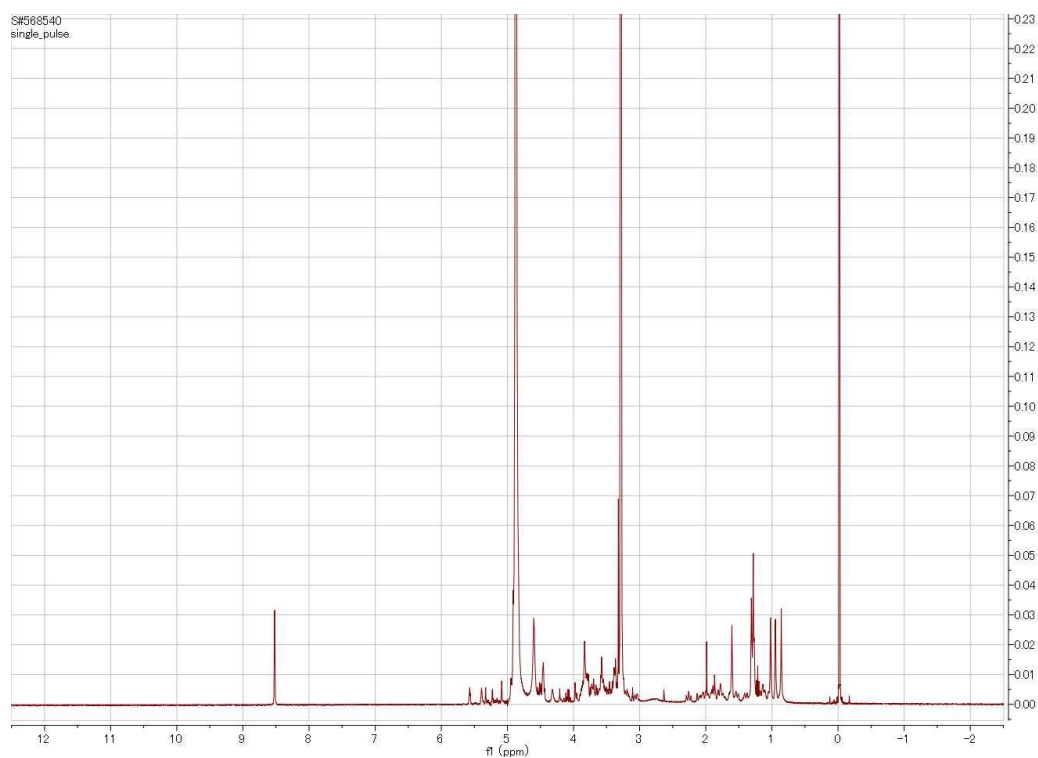

**$^1\text{H}$ -NMR analysis of Butyroside D ( $\text{CD}_3\text{OD}$ , 400 MHz)**

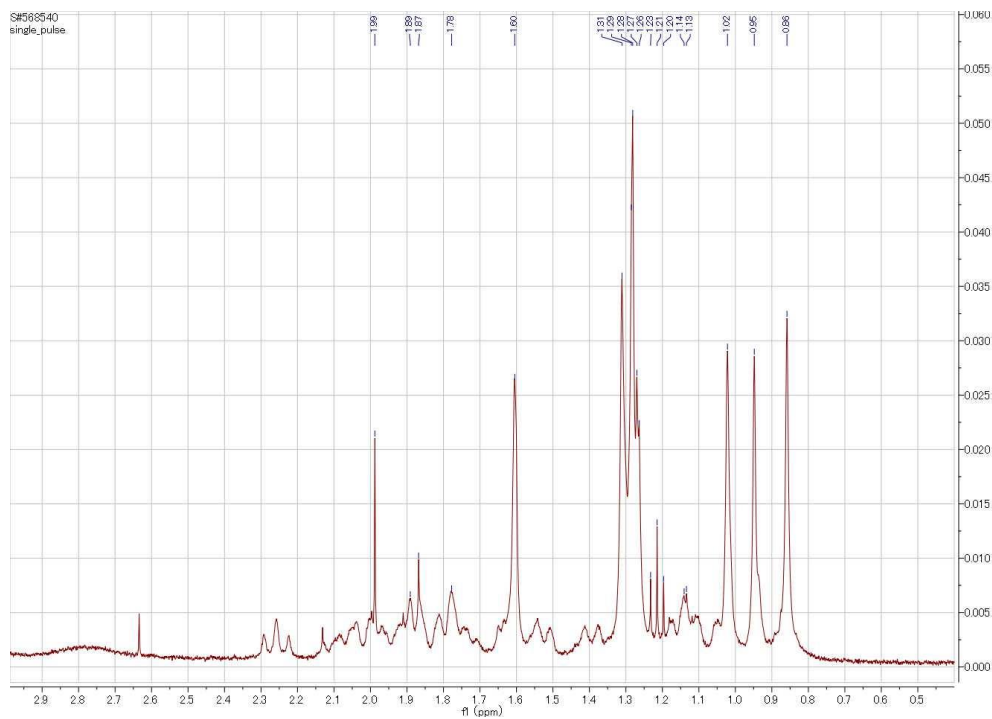

**$^1\text{H}$ -NMR (Expansion) analysis of Butyroside D ( $\text{CD}_3\text{OD}$ , 400 MHz)**

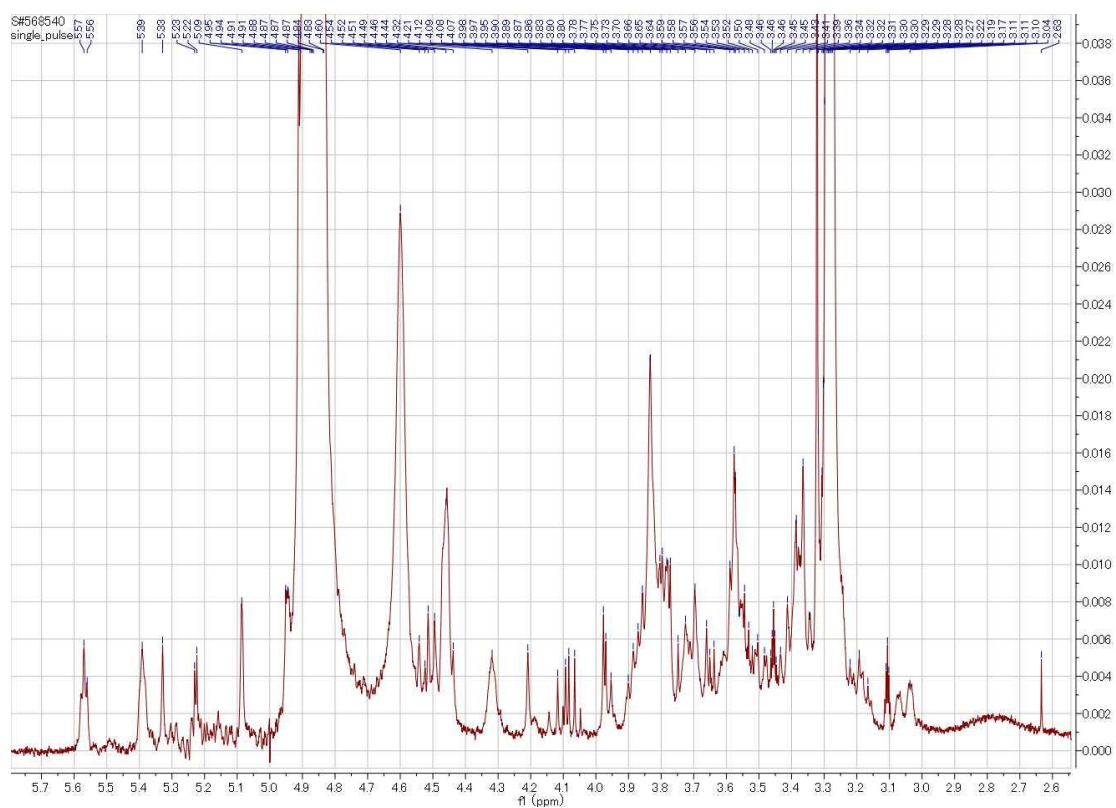

**$^1\text{H}$ -NMR (Expansion) analysis of Butyroside D ( $\text{CD}_3\text{OD}$ , 400 MHz)**
